# Supplementary material for: Viral Phylogenomics Using an Alignment-Free Method: A Three-Step Approach to Determine Optimal Length of k-mer
Source: PubMed Central journal article supplement (PMC5244389; doi:10.1038/srep40712), 2017-01-19
Supplement: srep40712-s1.pdf [file srep40712-s1.pdf]

## Supplementary information

# Viral Phylogenomics Using an Alignment-Free Method: A Three-Step Approach to Determine Optimal Length of *k-mer*

Qian Zhang<sup>2,3</sup>, Se-Ran Jun<sup>1,3</sup>, Michael Leuze<sup>4,5</sup>, David Ussery<sup>1,3</sup>, Intawat Nookaew<sup>1,3,\*</sup>

<sup>1</sup>Department of Biomedical Informatics, College of Medicine, University of Arkansas for Medical Sciences, Little Rock, AR 72205, USA

<sup>2</sup>UT-ORNL Graduate School of Genome Science and Technology, University of Tennessee, Knoxville, TN 37996, USA

<sup>3</sup>Comparative Genomics Group, Biosciences Division, Oak Ridge National Laboratory Oak Ridge, TN 37831 USA

<sup>4</sup>Joint Institute for Computational Sciences, University of Tennessee, Knoxville, TN 37831, USA

<sup>5</sup>Computational Biomolecular Modeling and Bioinformatics Group, Computer Science and Mathematics Division, Oak Ridge National Laboratories, Oak Ridge, TN 37831, USA

\*INookaew@uams.edu

**Table S1 Baltimore classification and ICTV Orders Information**

| Baltimore Classification    | counts | ICTV Order                 | counts |
|-----------------------------|--------|----------------------------|--------|
| dsDNA viruses, no RNA stage | 1826   | <i>Caudovirales</i>        | 1208   |
| (+)ssRNA viruses            | 911    | <i>Picornavirales</i>      | 157    |
| ssDNA viruses               | 649    | <i>Tymovirales</i>         | 141    |
| dsRNA viruses               | 192    | <i>Mononegavirales</i>     | 91     |
| (-)ssRNA viruses            | 180    | <i>Herpesvirales</i>       | 67     |
| Retro-transcribing viruses  | 131    | <i>Nidovirales</i>         | 58     |
| Unclassified viruses        | 8      | <i>Ligamenvirales</i>      | 12     |
| Unclassified virophages     | 5      | Unassigned or Unclassified | 2171   |
| Unassigned ssRNA viruses    | 3      |                            |        |

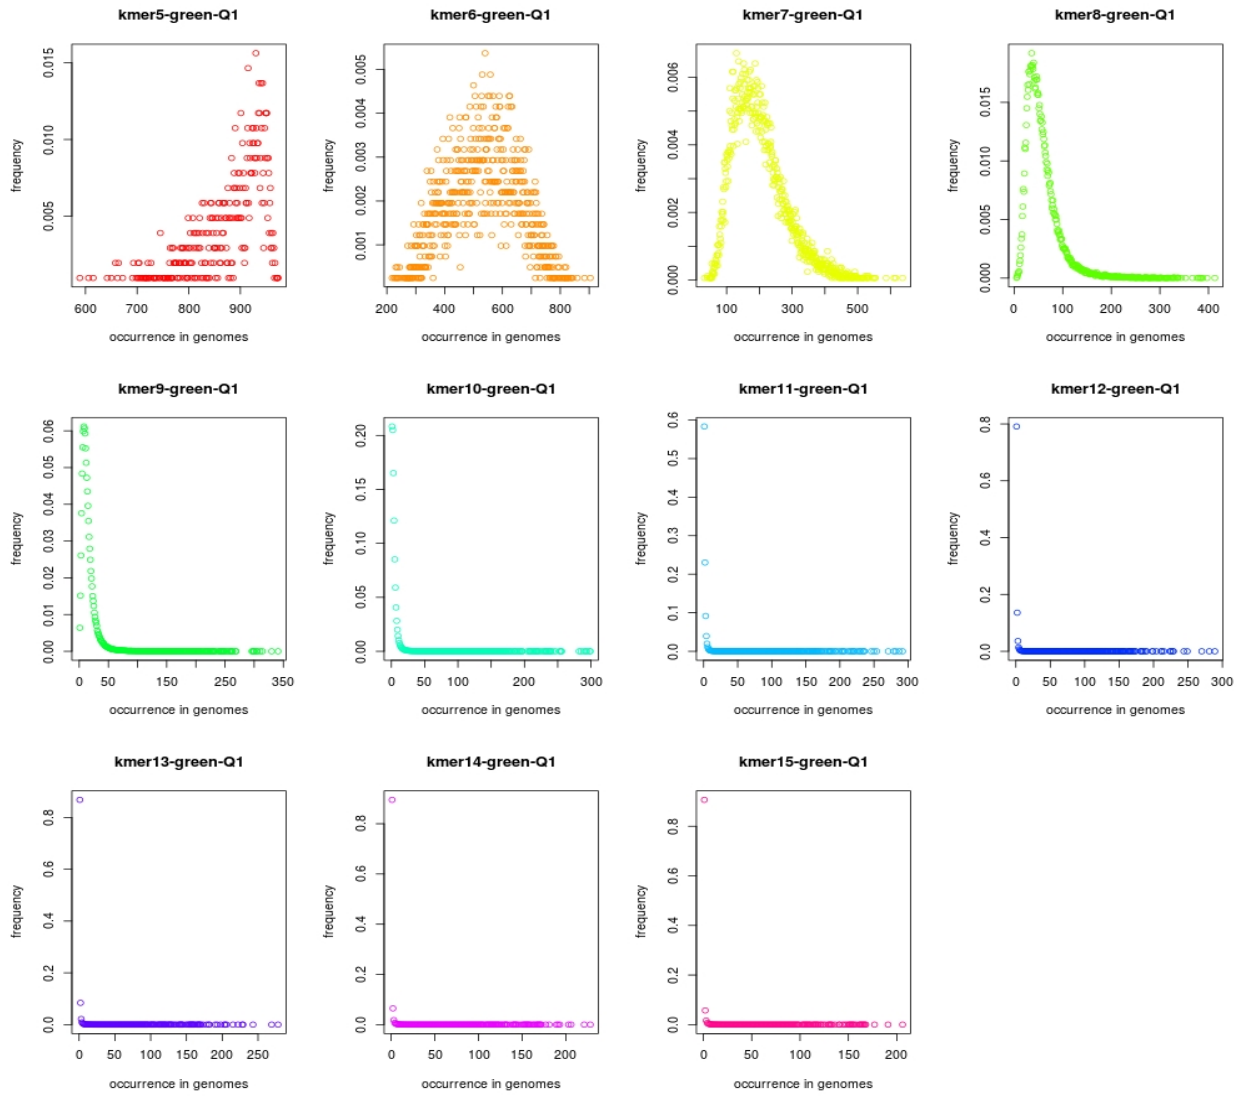

**Figure S1 Distribution of feature occurrences in subgroup Q1 (size < 25%)**

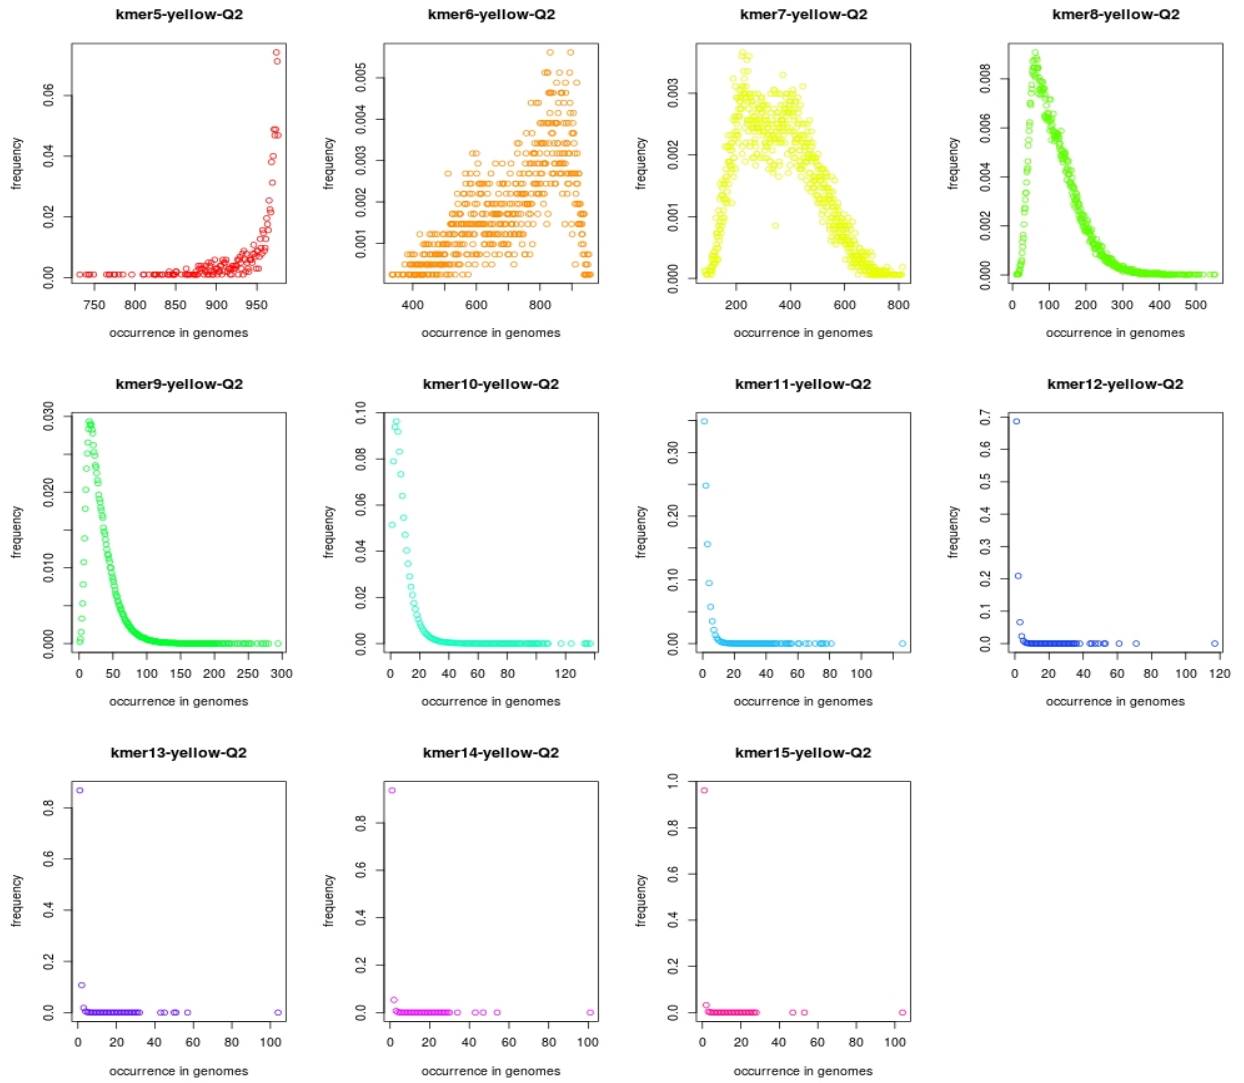

**Figure S2 Distribution of feature occurrences in subgroup Q2 (25% < size < 50%)**

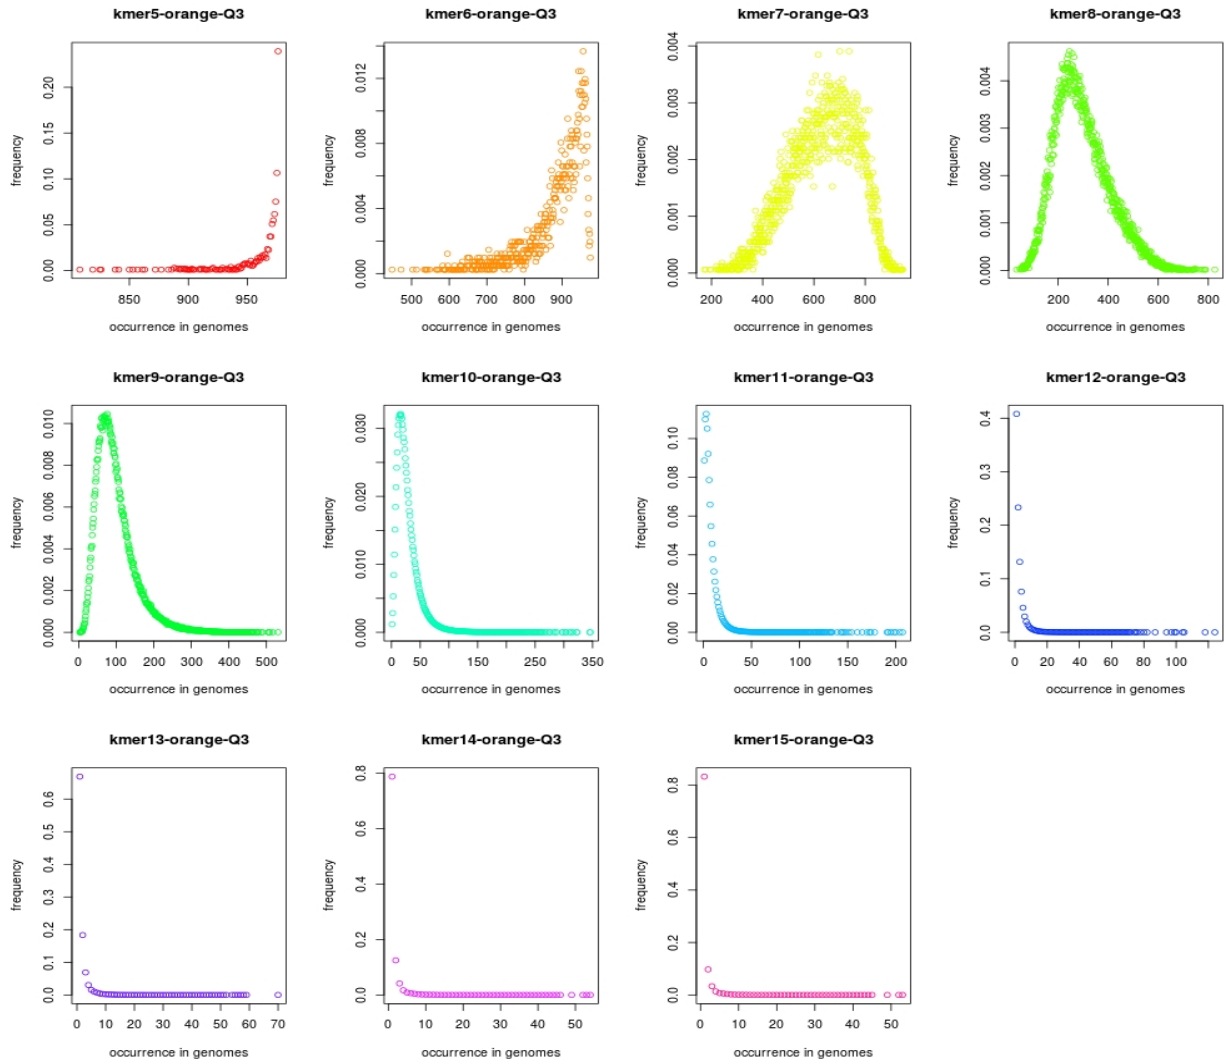

**Figure S3 Distribution of feature occurrences in subgroup Q3 (50% < size < 75%)**

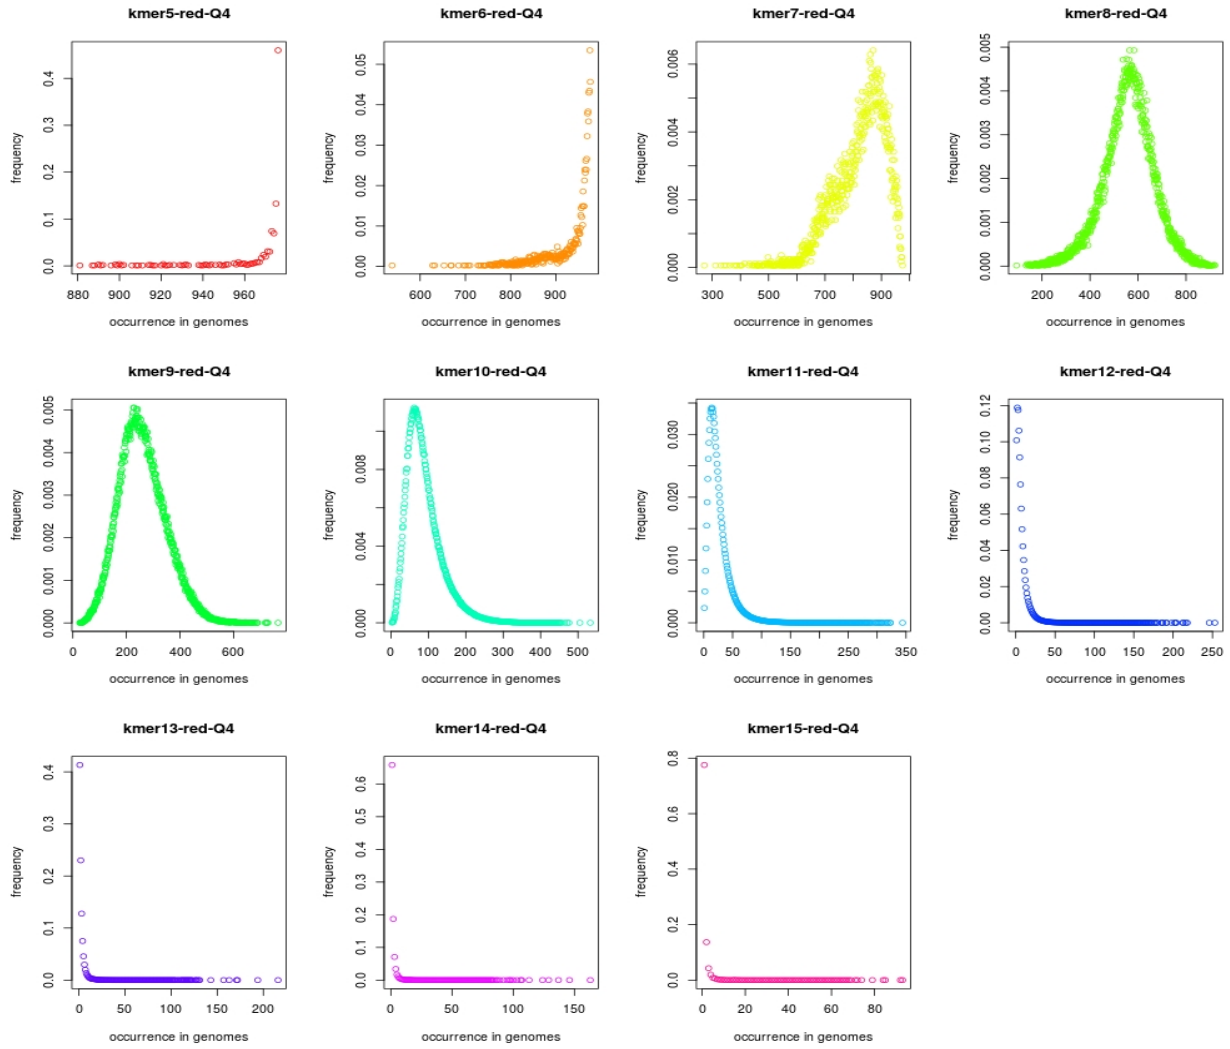

Figure S4 Distribution of feature occurrences in subgroup Q4 (size > 75%)

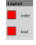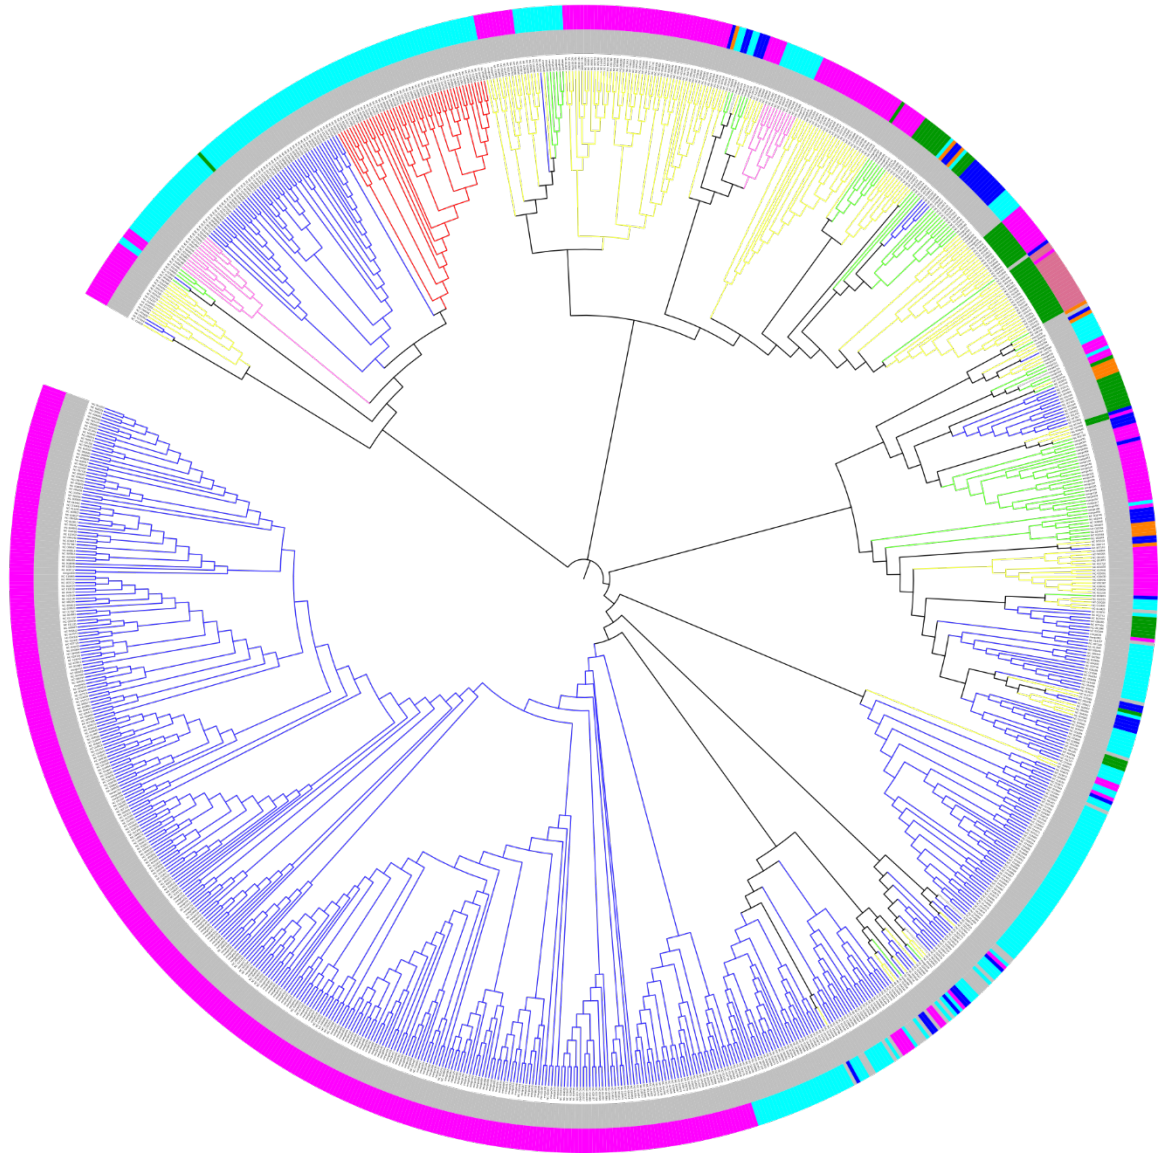

**Figure S5 Dendrogram of 976 RefSeq viral genomes in subgroup Q1 (genome size < 25%), when k=9. The braches are colored by Baltimore Classifications. The circles, from inside to outside, are colored by different orders and hosts. [Color information: (A) Branch: Baltimore Classification; dsDNA, no RNA stage: red; dsRNA: green; Retro-transcribing viruses: pink; ssDNA: blue; ssRNA negative-strand: bright blue; ssRNA positive-strand: yellow. (B) From inside to outside, first circle: Order; Caudovirales: red; Herpesvirales: green; Ligamenvirales: blue; Mononegavirales: orange; Nidovirales: cyan; Picornavirales: pink; Tymovirales: dark green; unclassified: silver; (C) From inside to outside, second circle: Host; protest: orange; archea: red; bacteria: dark green; fungi: blue; animal: cyan; animal and plants: pale violet red; plant: pink; environment or NA: silver.]**

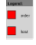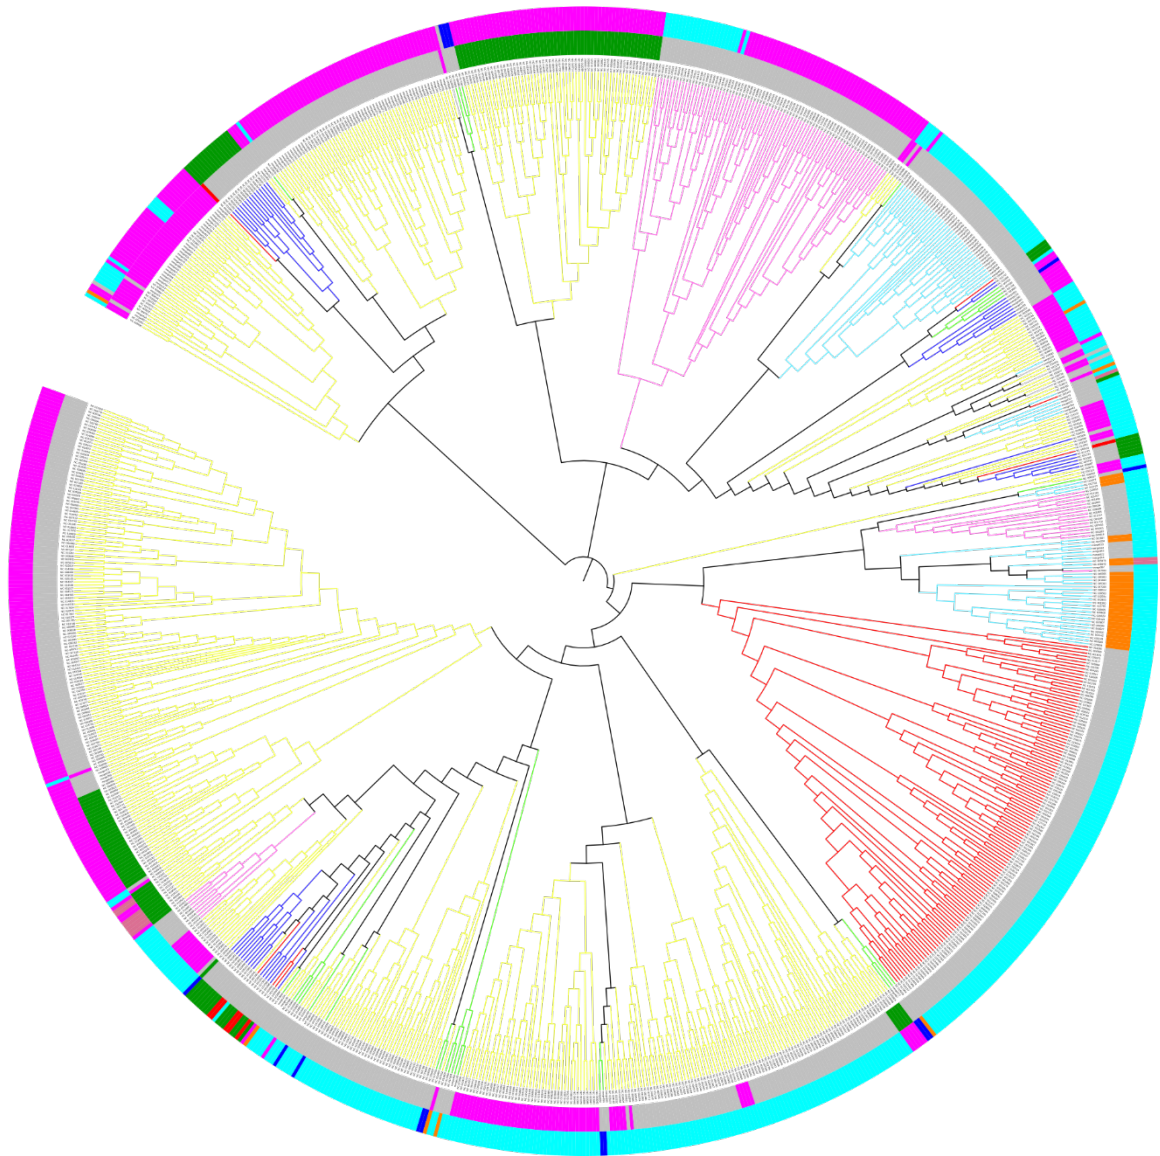

**Figure S6 Dendrogram of 977 RefSeq viral genomes in subgroup Q2 (genome size: 25%-50%), when k=10. The braches are colored by Baltimore Classifications. The circles, from inside to outside, are colored by different orders and hosts. [Color information: (A) Branch: Baltimore Classification; dsDNA, no RNA stage: red; dsRNA: green; Retro-transcribing viruses: pink; ssDNA: blue; ssRNA negative-strand: bright blue; ssRNA positive-strand: yellow. (B) From inside to outside, first circle: Order; Caudovirales: red; Herpesvirales: green; Ligamenvirales: blue; Mononegavirales: orange; Nidovirales: cyan; Picornavirales: pink; Tymovirales: dark green; unclassified: silver; (C) From inside to outside, second circle: Host; protest: orange; archaea: red; bacteria: dark green; fungi: blue; animal: cyan; animal and plants: pale violet red; plant: pink; environment or NA: silver.]**

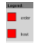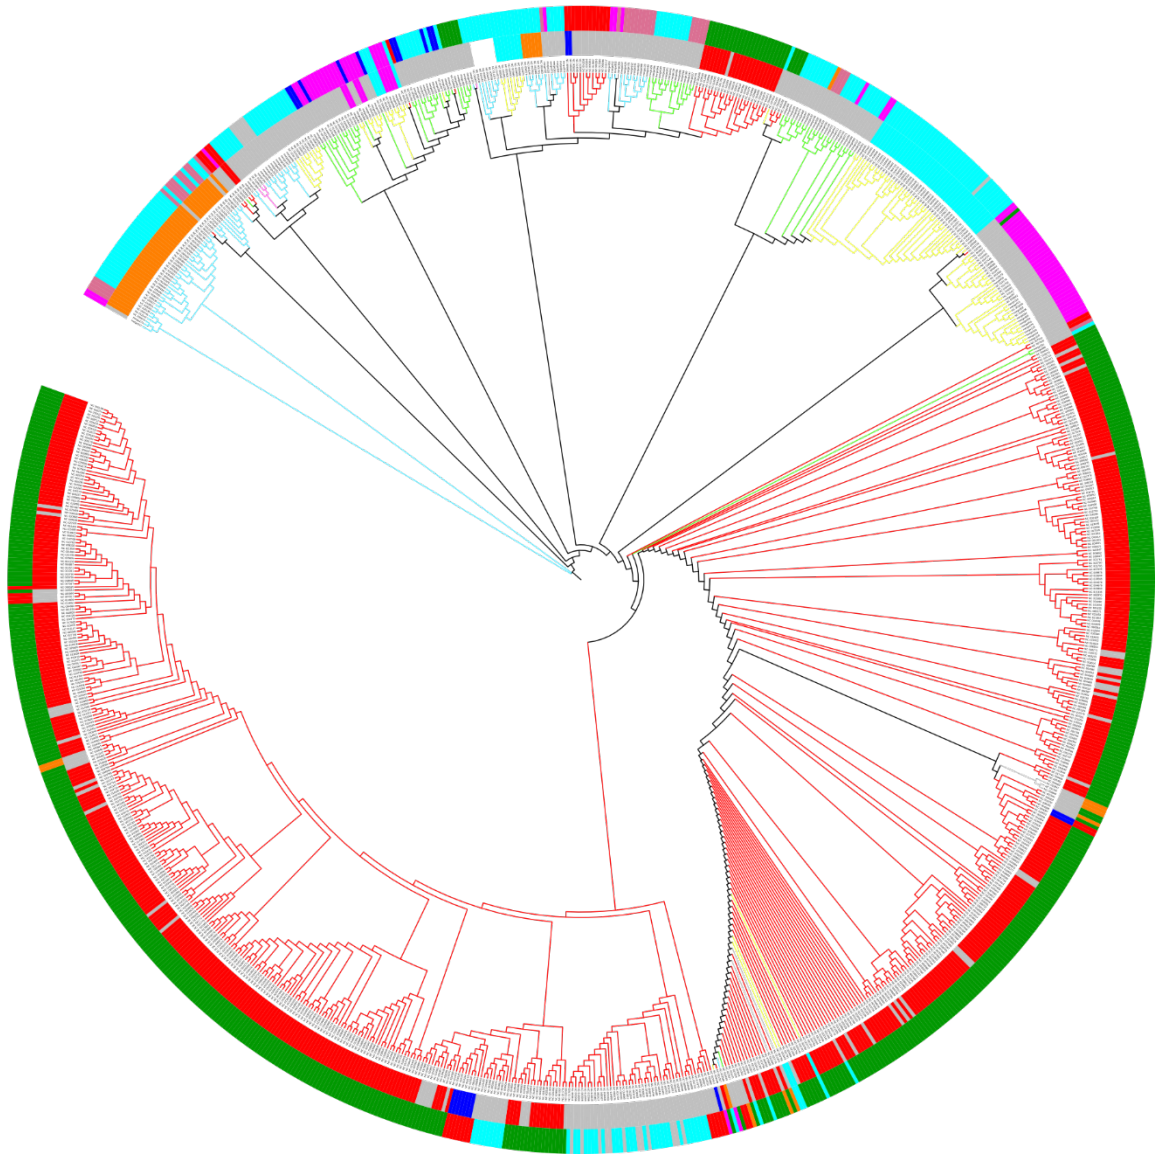

**Figure S7 Dendrogram of 977 RefSeq viral genomes in subgroup Q3 (genome size: 50%-75%), when k=11. The braches are colored by Baltimore Classifications. The circles, from inside to outside, are colored by different orders and hosts. [Color information: (A) Branch: Baltimore Classification; dsDNA, no RNA stage: red; dsRNA: green; Retro-transcribing viruses: pink; ssDNA: blue; ssRNA negative-strand: bright blue; ssRNA positive-strand: yellow. (B) From inside to outside, first circle: Order; Caudovirales: red; Herpesvirales: green; Ligamenvirales: blue; Mononegavirales: orange; Nidovirales: cyan; Picornavirales: pink; Tymovirales: dark green; unclassified: silver; (C) From inside to outside, second circle: Host; protest: orange; archea: red; bacteria: dark green; fungi: blue; animal: cyan; animal and plants: pale violet red; plant: pink; environment or NA: silver.]**



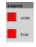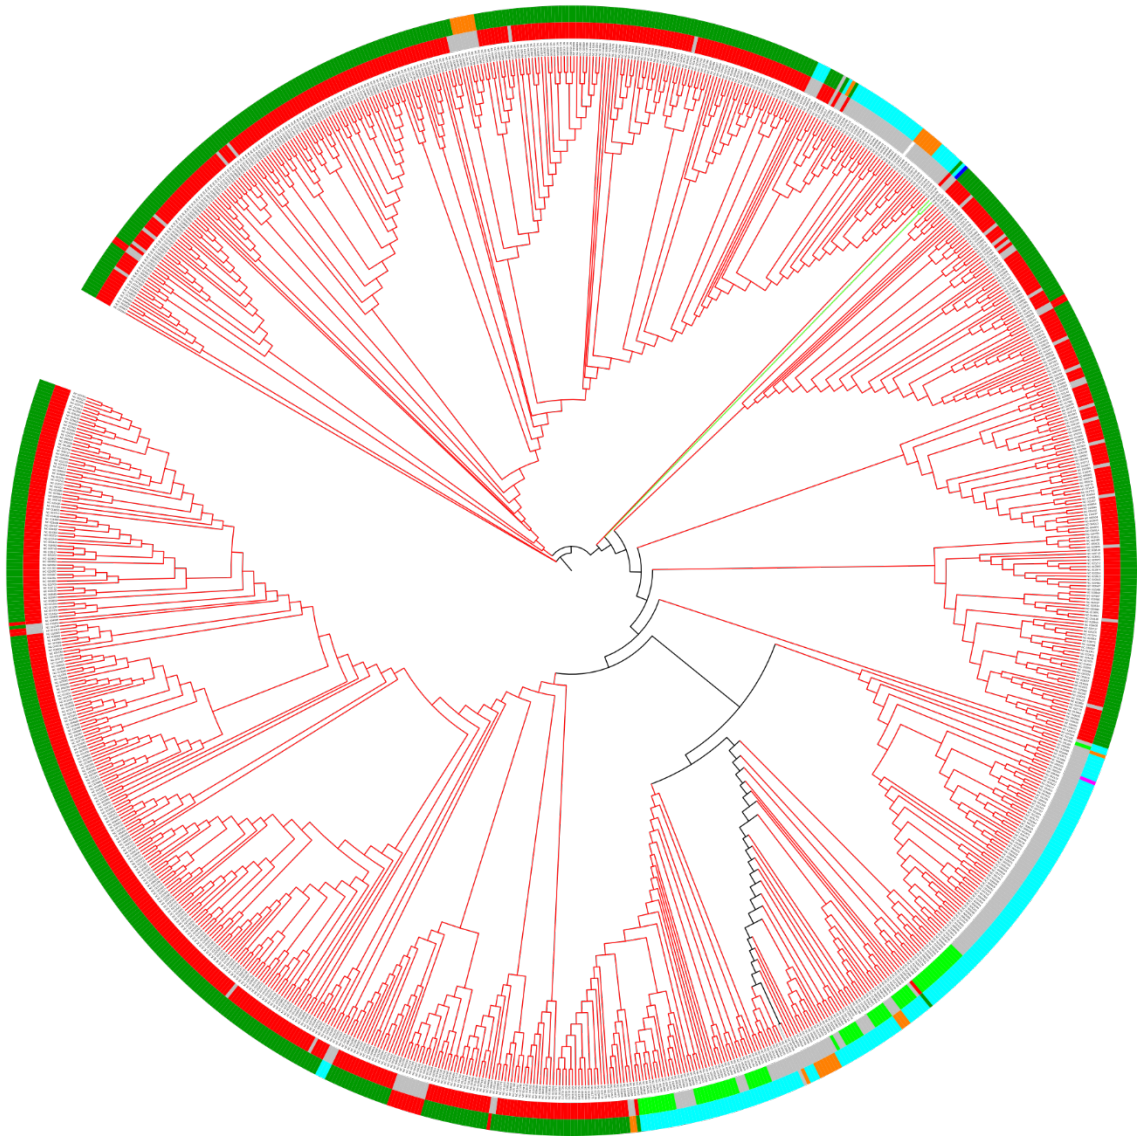

Figure S8 Dendrogram of 977 RefSeq viral genomes in subgroup Q4 (genome size: >75%), when k=12. The braches are colored by Baltimore Classifications. The circles, from inside to outside, are colored by different orders and hosts. [Color information: (A) Branch: Baltimore Classification; dsDNA, no RNA stage: red; dsRNA: green; Retro-transcribing viruses: pink; ssDNA: blue; ssRNA negative-strand: bright blue; ssRNA positive-strand: yellow. (B) From inside to outside, first circle: Order; Caudovirales: red; Herpesvirales: green; Ligamenvirales: blue; Mononegavirales: orange; Nidovirales: cyan; Picornavirales: pink; Tymovirales: dark green; unclassified: silver; (C) From inside to outside, second circle: Host; protest: orange; archea: red; bacteria: dark green; fungi: blue; animal: cyan; animal and plants: pale violet red; plant: pink; environment or NA: silver.]

**Table S2 Wilcoxon rank sum test result of the top 10 highest members of viral family**

|                                       | Siphoviridae | Geminiviridae | Myoviridae | Podoviridae | Papillomaviridae | Potyviridae | Parvoviridae | Picornaviridae | Flaviviridae | Betaflexiviridae |
|---------------------------------------|--------------|---------------|------------|-------------|------------------|-------------|--------------|----------------|--------------|------------------|
| Siphoviridae vs. Geminiviridae        | < 2.2 E-16   | < 2.2 E-16    |            |             |                  |             |              |                |              |                  |
| Siphoviridae vs. Myoviridae           | < 2.2 E-16   |               | < 2.2 E-16 |             |                  |             |              |                |              |                  |
| Siphoviridae vs. Podoviridae          | < 2.2 E-16   |               |            | < 2.2 E-16  |                  |             |              |                |              |                  |
| Siphoviridae vs. Papillomaviridae     | < 2.2 E-16   |               |            |             | < 2.2 E-16       |             |              |                |              |                  |
| Siphoviridae vs. Potyviridae          | < 2.2 E-16   |               |            |             |                  | < 2.2 E-16  |              |                |              |                  |
| Siphoviridae vs. Parvoviridae         | < 2.2 E-16   |               |            |             |                  |             | < 2.2 E-16   |                |              |                  |
| Siphoviridae vs. Picornaviridae       | < 2.2 E-16   |               |            |             |                  |             |              | < 2.2 E-16     |              |                  |
| Siphoviridae vs. Flaviviridae         | < 2.2 E-16   |               |            |             |                  |             |              |                | < 2.2 E-16   |                  |
| Siphoviridae vs. Betaflexiviridae     | < 2.2 E-16   |               |            |             |                  |             |              |                |              | < 2.2 E-16       |
| Geminiviridae vs. Myoviridae          |              | < 2.2 E-16    | < 2.2 E-16 |             |                  |             |              |                |              |                  |
| Geminiviridae vs. Podoviridae         |              | < 2.2 E-16    |            | < 2.2 E-16  |                  |             |              |                |              |                  |
| Geminiviridae vs. Papillomaviridae    |              | < 2.2 E-16    |            |             | < 2.2 E-16       |             |              |                |              |                  |
| Geminiviridae vs. Potyviridae         |              | < 2.2 E-16    |            |             |                  | < 2.2 E-16  |              |                |              |                  |
| Geminiviridae vs. Parvoviridae        |              | < 2.2 E-16    |            |             |                  |             | < 2.2 E-16   |                |              |                  |
| Geminiviridae vs. Picornaviridae      |              | < 2.2 E-16    |            |             |                  |             |              | < 2.2 E-16     |              |                  |
| Geminiviridae vs. Flaviviridae        |              | < 2.2 E-16    |            |             |                  |             |              |                | < 2.2 E-16   |                  |
| Geminiviridae vs. Betaflexiviridae    |              | < 2.2 E-16    |            |             |                  |             |              |                |              | < 2.2 E-16       |
| Myoviridae vs. Podoviridae            |              |               | < 2.2 E-16 | < 2.2 E-16  |                  |             |              |                |              |                  |
| Myoviridae vs. Papillomaviridae       |              |               | < 2.2 E-16 |             | < 2.2 E-16       |             |              |                |              |                  |
| Myoviridae vs. Potyviridae            |              |               | < 2.2 E-16 |             |                  | < 2.2 E-16  |              |                |              |                  |
| Myoviridae vs. Parvoviridae           |              |               | < 2.2 E-16 |             |                  |             | < 2.2 E-16   |                |              |                  |
| Myoviridae vs. Picornaviridae         |              |               | < 2.2 E-16 |             |                  |             |              | < 2.2 E-16     |              |                  |
| Myoviridae vs. Flaviviridae           |              |               | < 2.2 E-16 |             |                  |             |              |                | < 2.2 E-16   |                  |
| Myoviridae vs. Betaflexiviridae       |              |               | < 2.2 E-16 |             |                  |             |              |                |              | < 2.2 E-16       |
| Podoviridae vs. Papillomaviridae      |              |               |            | < 2.2 E-16  | < 2.2 E-16       |             |              |                |              |                  |
| Podoviridae vs. Potyviridae           |              |               |            | < 2.2 E-16  |                  | < 2.2 E-16  |              |                |              |                  |
| Podoviridae vs. Parvoviridae          |              |               |            | < 2.2 E-16  |                  |             | < 2.2 E-16   |                |              |                  |
| Podoviridae vs. Picornaviridae        |              |               |            | < 2.2 E-16  |                  |             |              | < 2.2 E-16     |              |                  |
| Podoviridae vs. Flaviviridae          |              |               |            | < 2.2 E-16  |                  |             |              |                | < 2.2 E-16   |                  |
| Podoviridae vs. Betaflexiviridae      |              |               |            | < 2.2 E-16  |                  |             |              |                |              | < 2.2 E-16       |
| Papillomaviridae vs. Potyviridae      |              |               |            |             | < 2.2 E-16       | < 2.2 E-16  |              |                |              |                  |
| Papillomaviridae vs. Parvoviridae     |              |               |            |             | < 2.2 E-16       |             | < 2.2 E-16   |                |              |                  |
| Papillomaviridae vs. Picornaviridae   |              |               |            |             | < 2.2 E-16       |             |              | < 2.2 E-16     |              |                  |
| Papillomaviridae vs. Flaviviridae     |              |               |            |             | < 2.2 E-16       |             |              |                | < 2.2 E-16   |                  |
| Papillomaviridae vs. Betaflexiviridae |              |               |            |             | < 2.2 E-16       |             |              |                |              | < 2.2 E-16       |
| Potyviridae vs. Parvoviridae          |              |               |            |             |                  | < 2.2 E-16  | < 2.2 E-16   |                |              |                  |
| Potyviridae vs. Picornaviridae        |              |               |            |             |                  | < 2.2 E-16  |              | 0.249381472    |              |                  |
| Potyviridae vs. Flaviviridae          |              |               |            |             |                  | < 2.2 E-16  |              |                | < 2.2 E-16   |                  |
| Potyviridae vs. Betaflexiviridae      |              |               |            |             |                  | < 2.2 E-16  |              |                |              | < 2.2 E-16       |
| Parvoviridae vs. Picornaviridae       |              |               |            |             |                  |             | 0.40400024   | < 2.2 E-16     |              |                  |
| Parvoviridae vs. Flaviviridae         |              |               |            |             |                  |             | < 2.2 E-16   |                | < 2.2 E-16   |                  |
| Parvoviridae vs. Betaflexiviridae     |              |               |            |             |                  |             | 9.69E-14     |                |              | < 2.2 E-16       |
| Picornaviridae vs. Flaviviridae       |              |               |            |             |                  |             |              | 0.017555005    | < 2.2 E-16   |                  |
| Picornaviridae vs. Betaflexiviridae   |              |               |            |             |                  |             |              | < 2.2 E-16     |              | < 2.2 E-16       |
| Flaviviridae vs. Betaflexiviridae     |              |               |            |             |                  |             |              |                | < 2.2 E-16   | < 2.2 E-16       |
